# Supplementary material for: Enhancing the electrochemical performance of trimetallic sulfide through metal-oxide nanocomposite engineering for high-performance supercapacitors
Source: Royal Society of Chemistry journal article supplement (doi:10.1039/d5ra09004k), 2026-01-01
Supplement: d5ra09004k1.pdf [file d5ra09004k1.pdf]

## **Supporting Information**

### **Enhancing the Electrochemical Performance of Trimetallic Sulfide through Metal-Oxide Nanocomposite Engineering for High-Performance Supercapacitors**

Muhammad Tariq<sup>a</sup>, Mohsin Ali Marwat<sup>a, 1, \*</sup>, Areeba Sajid<sup>a</sup>, Anusha Arif<sup>a</sup>, Zuhair Ehsan<sup>a</sup>,

Muhammad Ramzan Abdul Karim<sup>a</sup>, Syed Shaheen Shah<sup>b</sup>

<sup>a</sup> Faculty of Materials and Chemical Engineering, Ghulam Ishaq Khan (GIK) Institute of Engineering Sciences and Technology, Topi, 23640, Pakistan

<sup>b</sup> Department of Material Chemistry, Graduate School of Engineering, Kyoto University, Nishikyo-ku, Kyoto 615-8520, Japan

<sup>1</sup> Equal Contribution

\*Corresponding Author E-mail: mohsin.ali@giki.edu.pk, Tel: +92-938-281026, Fax: +92-938-281032

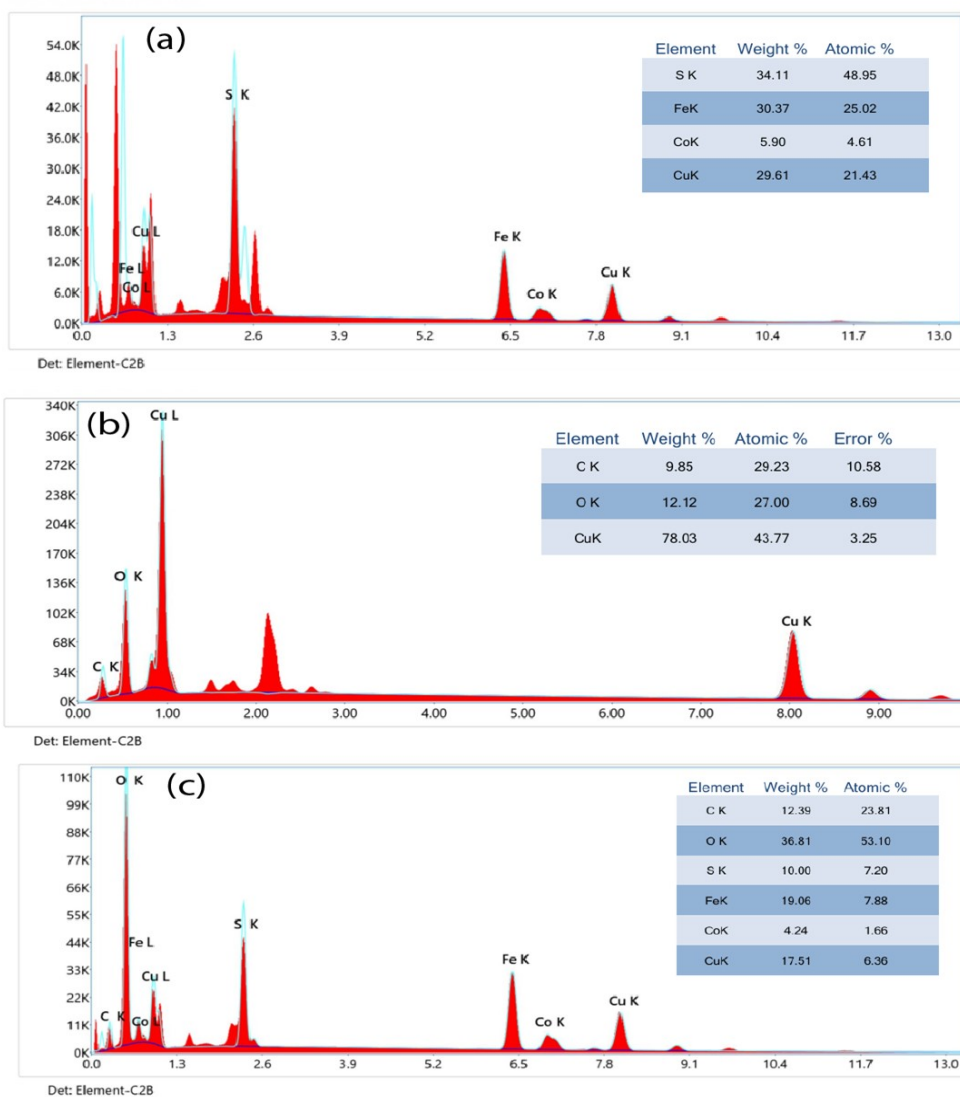

Fig. S1 The EDS spectra of (a)  $\text{Fe}_{0.67}\text{Cu}_{0.22}\text{Co}_{0.11}\text{S}$ , (b)  $\text{CuO}$ , and (c)  $\text{Fe}_{0.67}\text{Cu}_{0.22}\text{Co}_{0.11}\text{S}/\text{CuO}$  (5:1) demonstrate the elemental composition and successful composite synthesis.

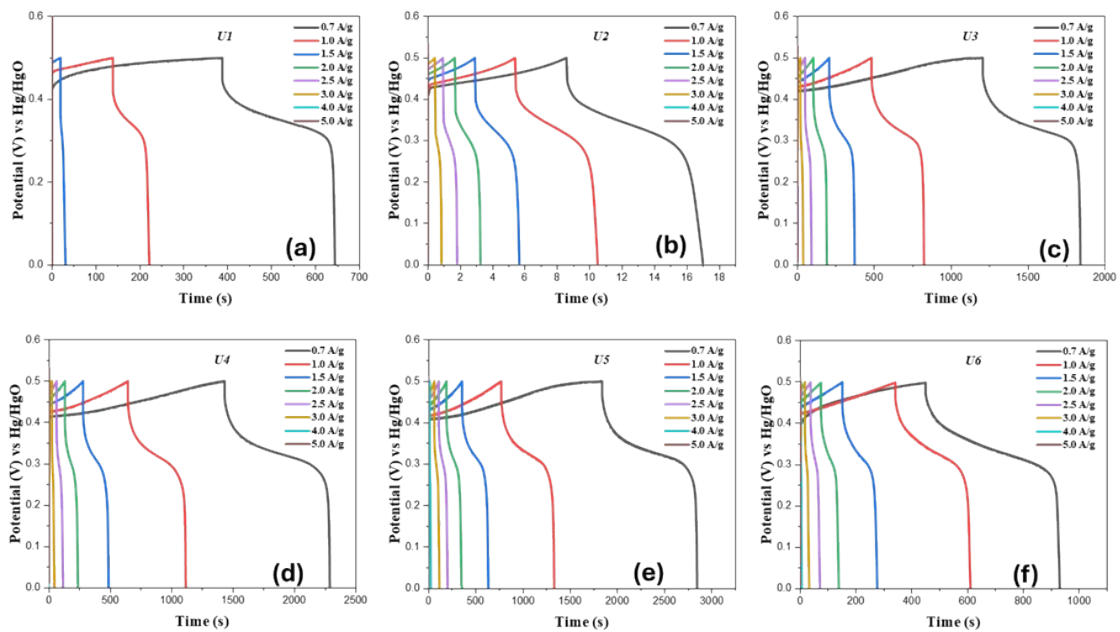

Fig. S2. GCD Curves of various electrodes at 0.7-6A. g<sup>-1</sup>, i.e., (a) U1, (b) U2, (c) U3, (d) U4, (e) U5, and (f) U6.

### Charge and mass balance:

Based on the cyclic voltammograms, the specific capacitance,  $C_s$ , of the corresponding electrode was calculated using the equation.

$$Q_s = \frac{\int_{v_i}^{v_f} I \times dv}{m \times v}$$

The value of specific capacity recorded for positive electrode was 314.16 C/g and for negative electrode was 153.33 C/g at same scan rate.

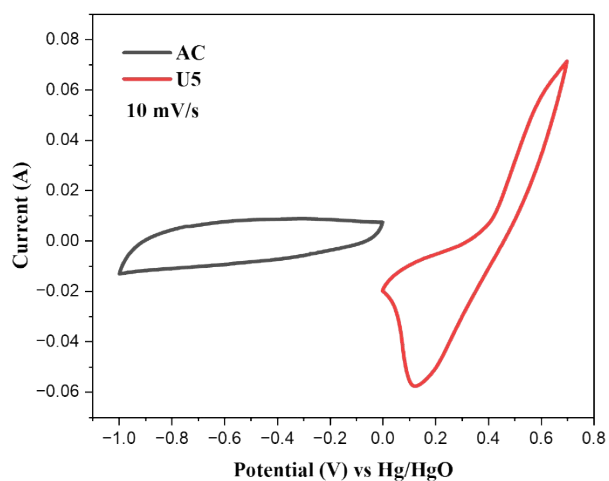

### Charge balance condition:

$$q^+ = q^- \Rightarrow Q_s^+ m^+ = Q_s^- m^-$$

### Calculating Mass ratio:

$$\frac{m^+}{m^-} = \frac{Q_s^-}{Q_s^+} = \frac{153.33}{314.16}$$

$$\frac{m^+}{m^-} = 0.488$$

$$m^+ : m^- = 0.488 : 1$$

$$m^- \approx 2 \times m^+$$

**Final Charge-Balanced Masses:**

| <b>Electrode</b> | <b>Mass (mg)</b> |
|------------------|------------------|
| U5 (Positive)    | 6 mg             |
| AC (Negative)    | 12 mg            |

The referred citation has been made as per reviewer's suggestion.
